# Supplementary material
Source: PubMed Central journal article supplement (PMC3587711)
Supplement: cr201321x2.pdf [file cr201321x2.pdf]

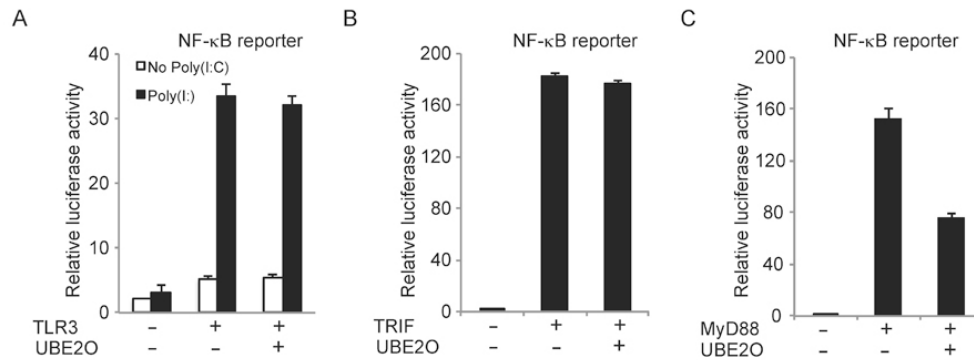

**Supplementary information, Figure S2** UBE2O has no effects on TLR3 mediated NF-κB signal activation.

**(A)** HEK293T cells co-transfected with NF-κB reporter, TLR3 or/and UBE2O were treated with poly (I:C) as indicated. **(B)** HEK293T cells were co-transfected with NF-κB reporter, together with TRIF and UBE2O vectors as indicated. **(C)** HEK293T cells were co-transfected with NF-κB reporter, together with MyD88 and UBE2O vectors as indicated. Luciferase activity was measured after 36 hours transfection. For all the luciferase assays, *LacZ* expression plasmid was co-transfected as internal reference. Each experiment above was performed in triplicate.
