# Supplementary material
Source: PubMed Central journal article supplement (PMC3587711)
Supplement: cr201321x3.pdf [file cr201321x3.pdf]

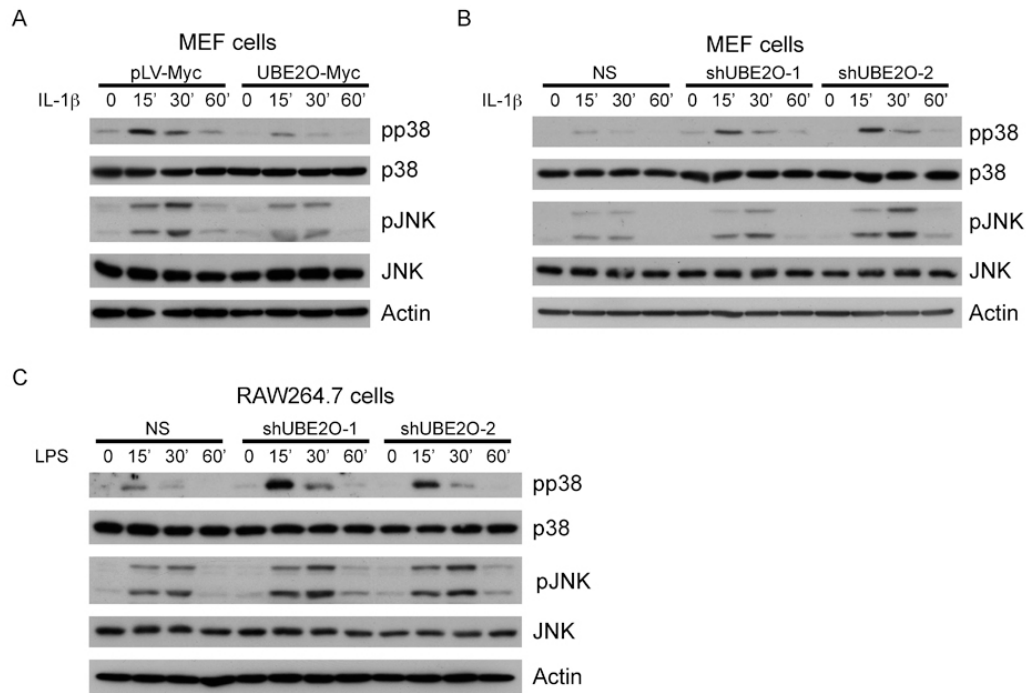

**Supplementary information, Figure S3** UBE2O impairs IL-1 $\beta$ /LPS-induced MAPK activation.

(A) Primary MEF cells were infected with control (pLV-Myc) or UBE2O-Myc lentiviral vectors, selected for puromycin-resistance, treated with 10 ng/ml IL-1 $\beta$  for the indicated time points and analyzed by immunoblotting. Same protein samples as used in Figure 2A. (B) and (C) Primary MEF cells (B) or macrophage Raw264.7 cells (C) infected with lentiviral vectors expressing non-specific control shRNA (NS) or UBE2O shRNAs (shUBE2O-1, -2) were stimulated with 10 ng/ml IL-1 $\beta$  (B) or 1  $\mu$ g/ml LPS (C) for indicated time points and analyzed by immunoblotting. Same protein samples as used in Figure 2C and Figure 2E.
