# Supplementary material
Source: PubMed Central journal article supplement (PMC3587711)
Supplement: cr201321x4.pdf [file cr201321x4.pdf]

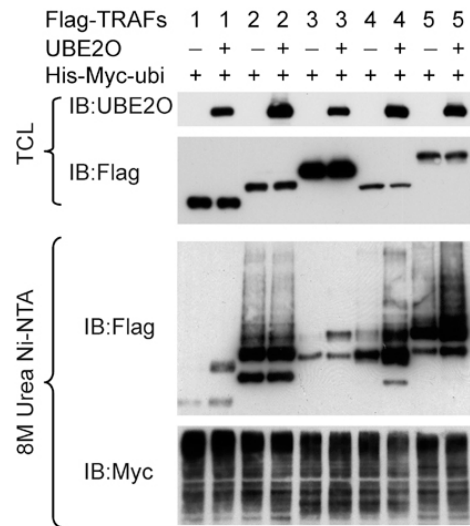

**Supplementary information, Figure S4** Effects of UBE2O on TRAF ubiquitination.

HeLa cells were co-transfected with Myc-His-ubiquitin, Flag-TRAFs with or without UBE2O as indicated. 44 hours post transfection the proteasome inhibitor MG132 was added for 4 hours, total cell lysates (TCL) were harvested for nickel pull down (Ni-NTA) and immunoblotting (IB) analysis.
